# Supplementary material for: Characterization of the bacterial and fungal microbiome in indoor dust and outdoor air samples: a pilot study
Source: Royal Society of Chemistry journal article supplement (doi:10.1039/c5em00639b), 2016-01-01
Supplement: c5em00639b1.xlsx [file c5em00639b1.xlsx]

## Sheet: Indoor_Dust_Boston
Metabolism	NAME	HD_01	HD_02	HD_03	HD_04	HD_05	HD_06	HD_07	HD_08	HD_09	HD_10	HD_11	HD_12	SD_01	mean abund
Amino_Acid_Metabolism	ko00290: Valine, leucine and isoleucine biosynthesis	0.0216242	0.0213979	0.0211865	0.0192395	0.0231868	0.0217454	0.0213789	0.0227465	0.0213716	0.0223381	0.0220844	0.0217053	0.0234856	0.021807
Carbohydrate_Metabolism	ko00660: C5-Branched dibasic acid metabolism	0.017681	0.0191531	0.0196758	0.0177935	0.0204866	0.0200403	0.0189608	0.0202022	0.019475	0.0195255	0.0197382	0.0210331	0.0217329	0.0196537
Lipid_Metabolism	ko00061: Fatty acid biosynthesis	0.0173354	0.0153035	0.0147897	0.0187188	0.0160654	0.0179869	0.0153828	0.0171425	0.0145735	0.016703	0.0158537	0.0152809	0.015187	0.0161787
Metabolism_of_Other_Amino_Acids	ko00471: D-Glutamine and D-glutamate metabolism	0.0148562	0.0136016	0.0133382	0.0142074	0.0168485	0.0152101	0.0132729	0.0174583	0.0125533	0.0166431	0.0145904	0.0153246	0.0161191	0.0149249
Metabolism_of_Cofactors_and_Vitamins	ko00770: Pantothenate and CoA biosynthesis	0.0156833	0.0141798	0.0141008	0.0133334	0.0149997	0.0159043	0.0138547	0.0151386	0.0138821	0.0154116	0.0152776	0.0143769	0.0161683	0.0147932
Metabolism_of_Cofactors_and_Vitamins	ko00670: One carbon pool by folate	0.0146873	0.0132854	0.0132491	0.0134818	0.0161259	0.0145016	0.0131491	0.0159738	0.0123161	0.0150595	0.0143122	0.0165368	0.0170332	0.0145932
Biosynthesis_of_Other_Secondary_Metabolites	ko00521: Streptomycin biosynthesis	0.0167558	0.0150131	0.0141312	0.0107299	0.0145205	0.0121481	0.0141192	0.0154995	0.0145275	0.0164862	0.0161785	0.0133258	0.0157525	0.0145529
Metabolism_of_Cofactors_and_Vitamins	ko00730: Thiamine metabolism	0.0154498	0.0130572	0.0125502	0.0140451	0.0162177	0.0145096	0.0132306	0.0158794	0.0125397	0.0154847	0.0144042	0.0148055	0.0159399	0.0144703
Metabolism_of_Terpenoids_and_Polyketides	ko00281: Geraniol degradation	0.0114013	0.0170421	0.0197231	0.0169785	0.0119961	0.012276	0.0193772	0.00929082	0.0202521	0.00995032	0.0129454	0.0175121	0.00747555	0.0143247
Glycan_Biosynthesis_and_Metabolism	ko00550: Peptidoglycan biosynthesis	0.0147017	0.0131058	0.0128345	0.0141694	0.0153029	0.0138436	0.0127015	0.0163085	0.0123502	0.0158711	0.0144168	0.0143615	0.0151896	0.0142429
Translation	ko00970: Aminoacyl-tRNA biosynthesis	0.0139536	0.0125624	0.0123407	0.014128	0.0155305	0.0137542	0.0124976	0.0159095	0.0117644	0.0151109	0.0141536	0.0140751	0.0161084	0.0139915
Amino_Acid_Metabolism	ko00250: Alanine, aspartate and glutamate metabolism	0.0141084	0.0137981	0.0136606	0.0121877	0.0142283	0.0140307	0.0135494	0.0141169	0.013633	0.0142179	0.0136992	0.0139742	0.0152977	0.0138848
Carbohydrate_Metabolism	ko00030: Pentose phosphate pathway	0.0139745	0.0134903	0.0129321	0.0118675	0.0135243	0.0142803	0.0131448	0.0142093	0.0131658	0.0144032	0.0134299	0.0126356	0.0156025	0.0135892
Metabolism_of_Other_Amino_Acids	ko00473: D-Alanine metabolism	0.0114829	0.012183	0.0122377	0.0137498	0.0148719	0.0154473	0.0122866	0.0142304	0.0119794	0.0134051	0.0116088	0.013655	0.0131861	0.0131018
Amino_Acid_Metabolism	ko00300: Lysine biosynthesis	0.0126441	0.0116956	0.0119479	0.0123319	0.0133834	0.0134585	0.011635	0.0139608	0.0113666	0.0133487	0.0126428	0.0137739	0.0160224	0.0129394
Metabolism_of_Other_Amino_Acids	ko00450: Selenocompound metabolism	0.0132814	0.0122807	0.0121502	0.0128919	0.0140695	0.0126828	0.0122327	0.0134869	0.0118817	0.0137137	0.013075	0.0124243	0.0128171	0.0128452
Metabolism_of_Cofactors_and_Vitamins	ko00785: Lipoic acid metabolism	0.0176604	0.0132755	0.011179	0.014276	0.0115237	0.0112876	0.011855	0.0129062	0.0121139	0.0138386	0.016013	0.00910071	0.00971414	0.0126726
Carbohydrate_Metabolism	ko00010: Glycolysis / Gluconeogenesis	0.0117958	0.012072	0.0118124	0.0119896	0.0129869	0.0127433	0.0121166	0.0130622	0.0119884	0.0130368	0.0119706	0.0115082	0.0129786	0.0123124
Carbohydrate_Metabolism	ko00620: Pyruvate metabolism	0.0120929	0.0119823	0.0118585	0.012753	0.0125021	0.0127064	0.0120583	0.0126583	0.0118743	0.0125952	0.012162	0.0121689	0.0121836	0.0122766
Replication_and_Repair	ko03430: Mismatch repair	0.0123599	0.0111999	0.0110324	0.0118081	0.0125386	0.0119762	0.0107574	0.0137143	0.0103537	0.0133869	0.0121951	0.0117524	0.0150157	0.0121608
Metabolism_of_Terpenoids_and_Polyketides	ko00903: Limonene and pinene degradation	0.0112455	0.0129999	0.0151362	0.0140295	0.0105782	0.0115373	0.0151987	0.00851763	0.0155171	0.00884644	0.0107947	0.0149648	0.0072306	0.0120459
Metabolism_of_Terpenoids_and_Polyketides	ko00900: Terpenoid backbone biosynthesis	0.0118874	0.0118503	0.0117781	0.0119195	0.0120973	0.0125848	0.0115015	0.0120191	0.0117856	0.012278	0.0119787	0.0118351	0.0124939	0.0120007
Amino_Acid_Metabolism	ko00340: Histidine metabolism	0.0113111	0.0119054	0.0118254	0.0129412	0.0112696	0.012552	0.0114063	0.0108222	0.0121339	0.0119838	0.0115293	0.0120371	0.0125995	0.0118705
Lipid_Metabolism	ko00072: Synthesis and degradation of ketone bodies	0.00735336	0.0137433	0.0151247	0.015949	0.0102604	0.0113341	0.0144782	0.00859486	0.0149329	0.00826495	0.00900823	0.0155	0.00669498	0.0116338
Metabolism_of_Cofactors_and_Vitamins	ko00790: Folate biosynthesis	0.0100719	0.0109649	0.0107241	0.0119253	0.0137467	0.0121116	0.0105227	0.0130565	0.0102151	0.0121984	0.0107454	0.0120343	0.0120959	0.0115702
Energy_Metabolism	ko00710: Carbon fixation in photosynthetic organisms	0.0141134	0.0108606	0.0102225	0.0100702	0.0109782	0.0111381	0.0104086	0.0121573	0.0100876	0.0126561	0.0127698	0.0109885	0.0136947	0.0115497
Translation	ko03010: Ribosome	0.0113994	0.0103487	0.0100622	0.0110816	0.0129262	0.0115475	0.0101473	0.0133902	0.00954005	0.0127377	0.0115309	0.0114644	0.0137942	0.0115362
Xenobiotics_Biodegradation_and_Metabolism	ko00930: Caprolactam degradation	0.00887634	0.0136016	0.01603	0.0109864	0.0101494	0.0100376	0.0155102	0.00759378	0.0161156	0.00790778	0.0103781	0.0151611	0.00649677	0.0114496
Lipid_Metabolism	ko00071: Fatty acid metabolism	0.0102971	0.0124365	0.0139025	0.0123385	0.00985642	0.0102845	0.0134229	0.0089784	0.0137874	0.00929873	0.0106607	0.0124419	0.00749243	0.0111691
Carbohydrate_Metabolism	ko00650: Butanoate metabolism	0.00868358	0.0113209	0.0124328	0.0108452	0.0100946	0.010321	0.0121321	0.00920917	0.0123922	0.0093683	0.00993826	0.0119347	0.00856912	0.0105571
Amino_Acid_Metabolism	ko00260: Glycine, serine and threonine metabolism	0.0107541	0.0102553	0.0104964	0.010054	0.0112192	0.0111124	0.0107376	0.0103659	0.0102795	0.00970036	0.0101703	0.011895	0.0101004	0.0105493
Replication_and_Repair	ko03440: Homologous recombination	0.0103039	0.00962272	0.00936874	0.0099177	0.0114507	0.0104005	0.00933734	0.0120597	0.00884886	0.0115688	0.010476	0.0105023	0.0123436	0.010477
Metabolism_of_Other_Amino_Acids	ko00410: beta-Alanine metabolism	0.00942362	0.0117323	0.0130149	0.0107799	0.00877715	0.0101262	0.01255	0.00802153	0.0132006	0.00824371	0.0101775	0.0115346	0.00767634	0.0104045
Carbohydrate_Metabolism	ko00020: Citrate cycle (TCA cycle)	0.00921545	0.0114733	0.0116442	0.0109574	0.00973102	0.0101389	0.0116964	0.00978116	0.0117212	0.00924343	0.0100684	0.0092479	0.0091882	0.0103159
Amino_Acid_Metabolism	ko00280: Valine, leucine and isoleucine degradation	0.0081498	0.0117027	0.0130458	0.0126359	0.00908872	0.010319	0.0125382	0.0079178	0.0128886	0.00788001	0.00935481	0.0121898	0.00607113	0.0102909
Membrane_Transport	ko02010: ABC transporters	0.0120914	0.00990194	0.00951579	0.0105064	0.0102742	0.0103944	0.0107342	0.00971656	0.0101512	0.00972693	0.0101486	0.0105674	0.00867899	0.0101852
Amino_Acid_Metabolism	ko00270: Cysteine and methionine metabolism	0.00915875	0.00992125	0.00962176	0.00993226	0.0108346	0.010864	0.0095931	0.0108961	0.00959549	0.0104315	0.00988335	0.00983719	0.0113292	0.010146
Metabolism_of_Cofactors_and_Vitamins	ko00780: Biotin metabolism	0.0120254	0.00946553	0.00896622	0.00870287	0.00982972	0.00929316	0.00777956	0.0104526	0.00850452	0.0106484	0.011081	0.0115111	0.0135339	0.010138
Carbohydrate_Metabolism	ko00640: Propanoate metabolism	0.00819986	0.0106166	0.0117954	0.011645	0.00955982	0.0102779	0.0114118	0.0088686	0.0114737	0.00863862	0.00918416	0.0115417	0.00812894	0.0101032
Energy_Metabolism	ko00720: Carbon fixation pathways in prokaryotes	0.00957782	0.00993986	0.0102922	0.0105707	0.00959362	0.00950414	0.00996767	0.009892	0.00975943	0.00964197	0.00982421	0.0108966	0.0101749	0.00997193
Replication_and_Repair	ko03410: Base excision repair	0.00856134	0.0100724	0.0102205	0.00925096	0.0106391	0.010017	0.0103229	0.00999134	0.0101728	0.0095958	0.00891336	0.00896633	0.00906343	0.00967594
Cell_Motility	ko02030: Bacterial chemotaxis	0.00910978	0.00960652	0.00910662	0.0161951	0.00703568	0.0118857	0.00934049	0.00742934	0.00974848	0.00703057	0.00900622	0.00981885	0.0096916	0.00961577
Metabolism_of_Cofactors_and_Vitamins	ko00750: Vitamin B6 metabolism	0.00974655	0.00955829	0.00926963	0.00878952	0.0102809	0.0099144	0.00952914	0.00996485	0.00915229	0.0093611	0.00935362	0.00960777	0.00983082	0.00956607
Amino_Acid_Metabolism	ko00400: Phenylalanine, tyrosine and tryptophan biosynthesis	0.00931543	0.00903256	0.00868201	0.00900441	0.0110106	0.00995171	0.00878727	0.0104525	0.00853314	0.00965383	0.00929065	0.0101805	0.0103519	0.00955742
Xenobiotics_Biodegradation_and_Metabolism	ko00983: Drug metabolism - other enzymes	0.00646759	0.00936618	0.00975747	0.00903169	0.0105408	0.0104725	0.00950229	0.0098026	0.00951934	0.00903175	0.00733414	0.00986818	0.0128279	0.00950173
Metabolism_of_Cofactors_and_Vitamins	ko00760: Nicotinate and nicotinamide metabolism	0.00942602	0.0095525	0.00920405	0.00892059	0.00975942	0.00936296	0.00910987	0.0097076	0.00917329	0.00959791	0.00945841	0.00915754	0.00999272	0.00941714
Carbohydrate_Metabolism	ko00051: Fructose and mannose metabolism	0.00806448	0.00815819	0.00826837	0.00767043	0.0108828	0.0100482	0.0080939	0.0107168	0.0080047	0.0102806	0.00869147	0.00919192	0.0122257	0.00925366
Metabolism_of_Cofactors_and_Vitamins	ko00740: Riboflavin metabolism	0.0106636	0.0089225	0.00866248	0.00881668	0.00936571	0.0091949	0.00882806	0.00957067	0.00850374	0.00978488	0.0095631	0.00932607	0.00886996	0.00923633
Carbohydrate_Metabolism	ko00520: Amino sugar and nucleotide sugar metabolism	0.00816019	0.00848636	0.0082294	0.00808109	0.010682	0.00920966	0.00822557	0.0104698	0.00815404	0.0100503	0.00865418	0.00872271	0.0106871	0.00906249
Replication_and_Repair	ko03030: DNA replication	0.0081633	0.00810701	0.00799561	0.0088631	0.00990146	0.00907618	0.00794691	0.0102132	0.007486	0.00952504	0.0085201	0.0090998	0.0111438	0.00892627
Metabolism_of_Other_Amino_Acids	ko00480: Glutathione metabolism	0.0115571	0.00931988	0.0084152	0.00770152	0.00906558	0.00831558	0.00892083	0.00915469	0.00853497	0.00931235	0.010527	0.00895652	0.00623198	0.00892409
Xenobiotics_Biodegradation_and_Metabolism	ko00625: Chloroalkane and chloroalkene degradation	0.00990722	0.00828386	0.00877306	0.00964844	0.0078805	0.00871137	0.00902345	0.0078969	0.00890195	0.00809059	0.00912711	0.00964158	0.00784924	0.00874887
Amino_Acid_Metabolism	ko00330: Arginine and proline metabolism	0.00942732	0.00850186	0.00821218	0.00812612	0.00742684	0.00823981	0.00835963	0.0079678	0.00852301	0.00844854	0.0087975	0.00797194	0.00883383	0.00837203
Nucleotide_Metabolism	ko00240: Pyrimidine metabolism	0.00772171	0.00757542	0.00745404	0.00825491	0.00946454	0.00850939	0.00752009	0.00951457	0.00709418	0.00904215	0.00787957	0.00858633	0.00988061	0.00834596
Metabolism_of_Cofactors_and_Vitamins	ko00860: Porphyrin and chlorophyll metabolism	0.0115623	0.00794981	0.00723119	0.0079765	0.00647246	0.00682919	0.00672165	0.00809677	0.00725111	0.00928383	0.0106973	0.00732147	0.00866105	0.00815805
Carbohydrate_Metabolism	ko00630: Glyoxylate and dicarboxylate metabolism	0.00772666	0.00875797	0.00879357	0.00829959	0.00677948	0.00746742	0.00865387	0.00711809	0.00893769	0.0073196	0.00831727	0.00852991	0.00768755	0.0080299
Transcription	ko03020: RNA polymerase	0.00777996	0.00799879	0.0077889	0.009475	0.00653306	0.0075906	0.00730602	0.00752944	0.00808702	0.00783215	0.00772918	0.00675812	0.00990058	0.00786991
Carbohydrate_Metabolism	ko00500: Starch and sucrose metabolism	0.00756728	0.00757579	0.00718164	0.00656404	0.00832952	0.00765069	0.00698281	0.00869018	0.00730438	0.00926449	0.00792046	0.00684287	0.0100528	0.00784053
Metabolism_of_Cofactors_and_Vitamins	ko00130: Ubiquinone and other terpenoid-quinone biosynthesis	0.010535	0.00801875	0.0067639	0.00730272	0.00609941	0.00703486	0.00688959	0.00753715	0.00732726	0.00866519	0.00964763	0.00545455	0.00591821	0.00747648
Carbohydrate_Metabolism	ko00052: Galactose metabolism	0.00550252	0.00672375	0.00665808	0.00570614	0.010181	0.00738548	0.00701653	0.00910605	0.00666212	0.00857704	0.00598631	0.00752716	0.00940187	0.007418
Xenobiotics_Biodegradation_and_Metabolism	ko00626: Naphthalene degradation	0.00759402	0.0070796	0.00793815	0.00956472	0.00746238	0.00709443	0.00810286	0.00666621	0.00771547	0.00669674	0.00679514	0.00813151	0.00541707	0.00740448
Energy_Metabolism	ko00920: Sulfur metabolism	0.00727777	0.00726061	0.00727017	0.00761415	0.00793495	0.00759827	0.00672578	0.00787995	0.0068155	0.00771753	0.0077244	0.00747222	0.00676462	0.00738892
Energy_Metabolism	ko00195: Photosynthesis	0.0127704	0.00700398	0.0051035	0.00578568	0.00629464	0.00529132	0.00529651	0.00860184	0.00572999	0.010786	0.0109789	0.00456689	0.00712235	0.00733323
Nucleotide_Metabolism	ko00230: Purine metabolism	0.00731511	0.00686416	0.00673985	0.00698919	0.00814968	0.007418	0.00678167	0.00802493	0.00648973	0.00779064	0.00722533	0.00746921	0.00787675	0.00731802
Metabolism_of_Other_Amino_Acids	ko00460: Cyanoamino acid metabolism	0.00654559	0.00773722	0.00719063	0.00615015	0.00685885	0.00772883	0.0073852	0.00726218	0.00781186	0.00806172	0.00754312	0.00571356	0.00820081	0.00724536
Xenobiotics_Biodegradation_and_Metabolism	ko00363: Bisphenol degradation	0.00639005	0.00715725	0.00880341	0.0070808	0.00493677	0.0066096	0.00873245	0.00508645	0.00924697	0.00556482	0.00703578	0.00903604	0.00718521	0.00714351
Amino_Acid_Metabolism	ko00380: Tryptophan metabolism	0.00573194	0.00825542	0.00891223	0.00784095	0.00610233	0.00696041	0.00885278	0.00531503	0.0092041	0.00544216	0.00654694	0.00747848	0.00440384	0.00700359
Carbohydrate_Metabolism	ko00040: Pentose and glucuronate interconversions	0.0058732	0.00757071	0.00722779	0.00591577	0.00664908	0.00723011	0.00753	0.00691577	0.00769182	0.00707508	0.00602449	0.00668715	0.00821659	0.00696981
Membrane_Transport	ko03070: Bacterial secretion system	0.00818418	0.00660516	0.00636359	0.00650545	0.00721612	0.00699762	0.00662275	0.00745538	0.00616236	0.00660605	0.00710288	0.00772502	0.0067581	0.00694651
Metabolism_of_Other_Amino_Acids	ko00430: Taurine and hypotaurine metabolism	0.00543635	0.00684358	0.00687569	0.00584681	0.00819086	0.00745031	0.00695413	0.00734252	0.00675103	0.00661673	0.00679062	0.0078426	0.00721144	0.00693482
Amino_Acid_Metabolism	ko00350: Tyrosine metabolism	0.00667413	0.00680736	0.00668527	0.00683136	0.00677776	0.00663647	0.00697075	0.00634016	0.00684197	0.0065336	0.00633936	0.00598862	0.00518834	0.00650886
Metabolism_of_Terpenoids_and_Polyketides	ko00253: Tetracycline biosynthesis	0.00750809	0.00516595	0.00467306	0.00815989	0.00693537	0.00740819	0.00508187	0.00755656	0.00435161	0.00740914	0.00628437	0.00664589	0.00601782	0.00639983
Amino_Acid_Metabolism	ko00310: Lysine degradation	0.00512515	0.00697467	0.00780546	0.00709732	0.00579469	0.00599784	0.00764363	0.004786	0.00776799	0.0045474	0.00557627	0.00782474	0.00376613	0.00620825
Lipid_Metabolism	ko01040: Biosynthesis of unsaturated fatty acids	0.0065738	0.00657055	0.00663052	0.00682914	0.0052595	0.0064884	0.00672427	0.00536457	0.00693639	0.00563665	0.00642654	0.0054471	0.00468449	0.00612092
Replication_and_Repair	ko03420: Nucleotide excision repair	0.00564683	0.00603403	0.00622372	0.0057939	0.0061915	0.00589333	0.00599514	0.00643517	0.00594739	0.00619207	0.00578329	0.00548757	0.00728862	0.0060702
Glycan_Biosynthesis_and_Metabolism	ko00511: Other glycan degradation	0.00258139	0.00548823	0.0046179	0.00346605	0.00829186	0.00517189	0.00498772	0.00723284	0.00481995	0.00549537	0.00401348	0.00583345	0.0113965	0.00564589
Energy_Metabolism	ko00910: Nitrogen metabolism	0.00555458	0.00545605	0.00556401	0.00505013	0.00533226	0.00593735	0.00543241	0.0053198	0.00548908	0.00523967	0.00545394	0.00578448	0.00594252	0.00550433
Xenobiotics_Biodegradation_and_Metabolism	ko00627: Aminobenzoate degradation	0.00458685	0.0062601	0.00669389	0.00597464	0.00513671	0.00536092	0.00668678	0.00443449	0.00706202	0.00468542	0.00524878	0.00526054	0.0036558	0.00546515
Xenobiotics_Biodegradation_and_Metabolism	ko00362: Benzoate degradation	0.00404643	0.00609901	0.0068906	0.00656996	0.00513137	0.00526045	0.00679352	0.00428935	0.00679859	0.00438015	0.00462808	0.00586818	0.00369067	0.00541895
Energy_Metabolism	ko00190: Oxidative phosphorylation	0.0062348	0.00517504	0.00498529	0.00505197	0.00449809	0.00479937	0.00488268	0.00532051	0.00485899	0.00528805	0.00591001	0.00481268	0.00562205	0.00518766
Amino_Acid_Metabolism	ko00360: Phenylalanine metabolism	0.00528461	0.00622914	0.00628825	0.0047569	0.00426681	0.00505674	0.00637187	0.00405705	0.00668422	0.00431438	0.00517686	0.00467788	0.00398167	0.00516511
Lipid_Metabolism	ko00561: Glycerolipid metabolism	0.00484885	0.0048256	0.00500583	0.0050736	0.00508484	0.00532952	0.00491342	0.00519381	0.00486745	0.00535735	0.00478178	0.00485606	0.00599016	0.00508679
Cell_Motility	ko02040: Flagellar assembly	0.00521234	0.00434751	0.004614	0.00838486	0.00328009	0.00813592	0.0048487	0.00314129	0.00459745	0.00245797	0.00405343	0.00711976	0.0046306	0.00498646
Lipid_Metabolism	ko00564: Glycerophospholipid metabolism	0.00473433	0.00449511	0.00474779	0.00547532	0.00493129	0.00523262	0.00452311	0.00528693	0.0043841	0.00490137	0.00487837	0.00494101	0.00615102	0.00497557
Xenobiotics_Biodegradation_and_Metabolism	ko00623: Toluene degradation	0.0054431	0.00556652	0.00583426	0.00448576	0.00439096	0.00435679	0.00570349	0.00461507	0.00565254	0.00458178	0.00534333	0.00434627	0.0042459	0.0049666
Glycan_Biosynthesis_and_Metabolism	ko00540: Lipopolysaccharide biosynthesis	0.00719197	0.00552691	0.00421094	0.00350036	0.00355776	0.00426749	0.00479888	0.00450097	0.00486312	0.0045014	0.00590916	0.00418821	0.00522429	0.0047878
Xenobiotics_Biodegradation_and_Metabolism	ko00642: Ethylbenzene degradation	0.00424267	0.00464615	0.00488314	0.0083677	0.00463093	0.00450268	0.00511668	0.00399365	0.00495567	0.00424306	0.00376615	0.00331576	0.00368064	0.00464191
Energy_Metabolism	ko00680: Methane metabolism	0.00416464	0.00432139	0.00454464	0.00413025	0.00406439	0.0044115	0.00418767	0.00443674	0.00438119	0.00451201	0.00469762	0.00470536	0.00560094	0.00447372
Biosynthesis_of_Other_Secondary_Metabolites	ko00960: Tropane, piperidine and pyridine alkaloid biosynthesis	0.00465816	0.00473883	0.00443328	0.00433256	0.00402268	0.00484309	0.00460904	0.00396972	0.0047159	0.00391926	0.00436385	0.0040624	0.00379099	0.00434306
Membrane_Transport	ko02060: Phosphotransferase system (PTS)	0.00124019	0.00213271	0.00265843	0.00467438	0.00823528	0.00745723	0.0030385	0.00650434	0.00190292	0.00548286	0.00206209	0.00521994	0.00491753	0.00427126
Xenobiotics_Biodegradation_and_Metabolism	ko00621: Dioxin degradation	0.00435237	0.0038266	0.00423001	0.00490737	0.00459539	0.00419101	0.0043469	0.00457861	0.00398736	0.00495184	0.00376757	0.00382975	0.00391046	0.00426733
Xenobiotics_Biodegradation_and_Metabolism	ko00624: Polycyclic aromatic hydrocarbon degradation	0.00419895	0.00456721	0.00457905	0.00386574	0.00441196	0.00388375	0.00500115	0.00406435	0.00501041	0.00431842	0.00427027	0.0038262	0.00347066	0.00426678
Metabolism_of_Terpenoids_and_Polyketides	ko00523: Polyketide sugar unit biosynthesis	0.00445007	0.00423781	0.00383359	0.0030092	0.0043445	0.00333446	0.00361718	0.00479996	0.00391306	0.00517621	0.00484206	0.00402198	0.00492355	0.00419259
Signal_Transduction	ko02020: Two-component system	0.00442013	0.00402559	0.00367444	0.00512734	0.00382205	0.00414199	0.00377377	0.00397387	0.00385826	0.0039833	0.0043362	0.00379222	0.00357236	0.00403858
Carbohydrate_Metabolism	ko00053: Ascorbate and aldarate metabolism	0.00370376	0.00399981	0.00397589	0.0044479	0.00455638	0.00417001	0.00423811	0.00401049	0.00402546	0.00384199	0.00371898	0.00403039	0.00340286	0.00400939
Biosynthesis_of_Other_Secondary_Metabolites	ko00940: Phenylpropanoid biosynthesis	0.0035005	0.00458405	0.00403553	0.003012	0.00327819	0.00434795	0.00417436	0.00364595	0.00457148	0.00442218	0.00396858	0.00290152	0.00489033	0.00394866
Metabolism_of_Terpenoids_and_Polyketides	ko00908: Zeatin biosynthesis	0.00378055	0.00349664	0.00341459	0.0036119	0.00429314	0.00391083	0.003361	0.00451878	0.00319133	0.00429172	0.00367926	0.00385369	0.00428363	0.00382208
Lipid_Metabolism	ko00591: Linoleic acid metabolism	0.00286181	0.00349486	0.00454039	0.00370627	0.00261103	0.0036826	0.00425362	0.00278651	0.00435075	0.00283991	0.00340245	0.00505399	0.00460442	0.00370682
Xenobiotics_Biodegradation_and_Metabolism	ko00791: Atrazine degradation	0.00564409	0.00354705	0.00353515	0.00234338	0.00352137	0.00285369	0.00367724	0.00332285	0.0034744	0.00365966	0.00463897	0.0043975	0.00232891	0.0036111
Xenobiotics_Biodegradation_and_Metabolism	ko00643: Styrene degradation	0.00269132	0.00450774	0.00485796	0.00324108	0.00263994	0.003521	0.00476902	0.00273511	0.00528829	0.00301273	0.00386959	0.00255018	0.00306157	0.00359581
Xenobiotics_Biodegradation_and_Metabolism	ko00361: Chlorocyclohexane and chlorobenzene degradation	0.0048345	0.0039372	0.0039886	0.0032773	0.00290729	0.00304356	0.00413134	0.00296413	0.00415454	0.00326245	0.00423934	0.00306414	0.00237336	0.00355213
Carbohydrate_Metabolism	ko00562: Inositol phosphate metabolism	0.00344519	0.00362961	0.00378424	0.00435233	0.0031592	0.00323456	0.00387242	0.0030242	0.0037836	0.00285999	0.00330104	0.00328151	0.00266122	0.00341455
Biosynthesis_of_Other_Secondary_Metabolites	ko00311: Penicillin and cephalosporin biosynthesis	0.00248237	0.00394575	0.00336313	0.00326995	0.00299904	0.00323167	0.00369125	0.0028716	0.00397406	0.00339728	0.00298661	0.00215676	0.00184101	0.00309311
Biosynthesis_of_Other_Secondary_Metabolites	ko00312: beta-Lactam resistance	0.00322519	0.00383882	0.00286663	0.00286549	0.0020199	0.00341956	0.00308737	0.00285565	0.00368185	0.00365473	0.00352472	0.00184307	0.00227749	0.00301234
Transport_and_Catabolism	ko04146: Peroxisome	0.00262529	0.00324581	0.0033324	0.00344742	0.00284449	0.00269321	0.00316889	0.00273394	0.00327365	0.00276302	0.00307875	0.00316795	0.00250485	0.00299074
Xenobiotics_Biodegradation_and_Metabolism	ko00622: Xylene degradation	0.00229795	0.00264975	0.00306857	0.00237132	0.00237321	0.00206566	0.00300207	0.0025988	0.0029734	0.00308091	0.00230885	0.00187658	0.00272285	0.00256846
Xenobiotics_Biodegradation_and_Metabolism	ko00364: Fluorobenzoate degradation	0.00314292	0.00274144	0.00286071	0.00217915	0.00192575	0.00218558	0.00279864	0.00202009	0.00284912	0.00238208	0.00324821	0.00158586	0.0014933	0.00241637
Xenobiotics_Biodegradation_and_Metabolism	ko00633: Nitrotoluene degradation	0.00189009	0.00277729	0.00384862	0.00140701	0.00124493	0.00192429	0.00301737	0.0016577	0.00345043	0.00196888	0.00259525	0.00151465	0.00341335	0.0023623
Energy_Metabolism	ko00196: Photosynthesis - antenna proteins	0.00589288	0.00228323	0.00112008	0.00142662	0.00131725	0.000912914	0.00120598	0.00273865	0.00159686	0.00426177	0.00464855	0.00035554	0.0017087	0.00226685
Metabolism_of_Cofactors_and_Vitamins	ko00830: Retinol metabolism	0.00293723	0.00218436	0.00206931	0.00238315	0.00222836	0.00204417	0.0023107	0.00216079	0.00213531	0.00223182	0.00247808	0.00201911	0.0011091	0.00217627
Replication_and_Repair	ko03450: Non-homologous end-joining	0.00244605	0.00284864	0.00313351	0.00191834	0.00159812	0.00210589	0.0032791	0.00138794	0.00325337	0.0012485	0.00165492	0.00115934	0.00107163	0.00208503
Lipid_Metabolism	ko00592: alpha-Linolenic acid metabolism	0.00207216	0.00280923	0.00262382	0.00269146	0.00153962	0.00168878	0.00285552	0.00168194	0.00302902	0.00186547	0.00208754	0.000604698	0.0011598	0.00205454
Lipid_Metabolism	ko00590: Arachidonic acid metabolism	0.00181065	0.00203169	0.00188161	0.00185559	0.00171569	0.00181809	0.00192974	0.00180728	0.00201916	0.00183969	0.00209126	0.00108594	0.00094583	0.00175632
Lipid_Metabolism	ko00600: Sphingolipid metabolism	0.00110331	0.00164086	0.00163339	0.00105697	0.0020466	0.00142198	0.00156369	0.00190164	0.00167477	0.00163706	0.00138717	0.00160967	0.00376554	0.00172636
Metabolism_of_Terpenoids_and_Polyketides	ko00906: Carotenoid biosynthesis	0.00298321	0.00168762	0.00119779	0.00183497	0.00115434	0.00142262	0.00130724	0.00170138	0.00137772	0.00220698	0.00258924	0.000639083	0.00107814	0.00162926
Metabolism_of_Terpenoids_and_Polyketides	ko01053: Biosynthesis of siderophore group nonribosomal peptides	0.00111792	0.00152176	0.00161132	0.00152069	0.00149267	0.00190126	0.00166729	0.00142284	0.00166013	0.0013483	0.00139555	0.00197241	0.00133637	0.00153604
Metabolism_of_Other_Amino_Acids	ko00440: Phosphonate and phosphinate metabolism	0.00145804	0.00122512	0.0012114	0.00206639	0.00151615	0.0020104	0.00140026	0.00132641	0.00115943	0.00120421	0.00106558	0.00183761	0.00134122	0.00144786
Biosynthesis_of_Other_Secondary_Metabolites	ko00941: Flavonoid biosynthesis	0.00246003	0.00169165	0.00128601	0.00126631	0.000922991	0.000902083	0.00131572	0.00140868	0.00163871	0.00200333	0.00236843	0.000351565	0.00106584	0.00143703
Glycan_Biosynthesis_and_Metabolism	ko00531: Glycosaminoglycan degradation	0.0003244	0.00141149	0.00136748	0.000902055	0.00226933	0.00127985	0.00117326	0.00195542	0.00118546	0.00144688	0.000727766	0.00125811	0.00322823	0.00142536
Glycan_Biosynthesis_and_Metabolism	ko00510: N-Glycan biosynthesis	0.00119673	0.00103723	0.000863142	0.000580274	0.000641139	0.000551406	0.000829657	0.000828848	0.000973297	0.0010409	0.00118963	0.000453753	0.000736084	0.000840161
Lipid_Metabolism	ko00140: Steroid hormone biosynthesis	0.000668716	0.000739606	0.000679498	0.000337453	0.000468647	0.000479667	0.000673501	0.000419218	0.00079794	0.000547929	0.000602452	0.000288725	0.000498872	0.000554017
Translation	ko03013: RNA transport	0.000431073	0.000374745	0.000347368	0.00062759	0.000586985	0.000640962	0.000321386	0.00068841	0.000318204	0.000693129	0.000484226	0.000471212	0.000774895	0.000520014
Lipid_Metabolism	ko00100: Steroid biosynthesis	0.000959537	0.000578764	0.000449444	0.000613422	0.000278164	0.00027078	0.000441592	0.000492559	0.000549176	0.000758416	0.000906316	0.000105822	0.000334206	0.000518323
Translation	ko03008: Ribosome biogenesis in eukaryotes	0.000411979	0.000493187	0.000527169	0.000439429	0.000569146	0.000489856	0.000513671	0.000542802	0.000487074	0.000496386	0.000460861	0.000458276	0.000536159	0.000494307
Lipid_Metabolism	ko00565: Ether lipid metabolism	0.000255054	0.000653616	0.000834622	0.000343173	0.000391997	0.000591847	0.000703905	0.000339008	0.000862783	0.00031186	0.000551144	0.000199886	0.000273154	0.000485542
Transport_and_Catabolism	ko04142: Lysosome	0.000160437	0.000459162	0.000384924	0.000293756	0.000656228	0.000373831	0.000424079	0.000547199	0.000400952	0.000367756	0.000254569	0.000405417	0.000807088	0.0004258
Xenobiotics_Biodegradation_and_Metabolism	ko00351: DDT degradation	4.53e-05	0.000237921	0.000319642	0.000231642	0.000119825	0.000119917	0.000209473	0.000179475	0.000228783	0.000175172	9.68e-05	8.52e-05	0.000112156	0.000166254
Metabolism_of_Terpenoids_and_Polyketides	ko01056: Biosynthesis of type II polyketide backbone	1.65e-05	0.000224555	0.000239027	6.86e-05	2.74e-05	8.25e-05	0.000304459	2.66e-05	0.000214565	6.37e-05	0.000114201	5.88e-05	0.00012301	0.000120301
Biosynthesis_of_Other_Secondary_Metabolites	ko00901: Indole alkaloid biosynthesis	0.00019417	0.000100515	0.000124474	6.18e-05	6.57e-05	0.000151637	0.000122287	7.66e-05	0.000134943	3.82e-05	7e-05	1.88e-05	7.53e-05	9.49558e-05
Biosynthesis_of_Other_Secondary_Metabolites	ko00331: Clavulanic acid biosynthesis	1.92e-05	0.00011406	0.000254812	3.43e-05	2.28e-05	3.09e-05	0.000166069	2.13e-05	0.000165448	4.6e-05	2.98e-05	1.96e-05	4.34e-05	7.44376e-05
Metabolism_of_Terpenoids_and_Polyketides	ko00522: Biosynthesis of 12-, 14- and 16-membered macrolides	9.6e-06	5.88e-05	4.51e-05	2.86e-05	1.14e-05	3.35e-05	0.000100648	2.39e-05	8.27e-05	2.48e-05	4.72e-05	2.55e-05	0.000173661	5.11853e-05
Biosynthesis_of_Other_Secondary_Metabolites	ko00943: Isoflavonoid biosynthesis	3.53e-06	5.35e-05	2.71e-05	0.000191196	3.72e-05	1.55e-05	2.8e-05	6.84e-06	2.77e-05	1.36e-05	8.51e-06	3.36e-06	1.14e-05	3.28797e-05
Transcription	ko03022: Basal transcription factors	1.27e-06	9.87e-06	1.25e-05	0	2.11e-06	3.57e-06	2.32e-06	6.14e-06	1.07e-05	1.14e-05	4.58e-06	1.81e-06	4.45e-06	5.44e-06
Glycan_Biosynthesis_and_Metabolism	ko00513: Various types of N-glycan biosynthesis	6.58e-07	5.13e-06	6.76e-06	0	2.74e-06	1.86e-06	1.21e-06	3.19e-06	5.89e-06	5.95e-06	2.38e-06	9.41e-07	3.27e-05	5.33915e-06
Glycan_Biosynthesis_and_Metabolism	ko00601: Glycosphingolipid biosynthesis - lacto and neolacto series	3.16e-06	3.29e-06	4.16e-06	0	0	1.19e-05	4.65e-06	1.35e-05	1.13e-05	3.27e-06	7.45e-06	9.04e-07	2.78e-06	5.10492e-06
Translation	ko03015: mRNA surveillance pathway	6.09e-07	3.96e-06	9.02e-06	2.54e-06	2.03e-06	2.29e-06	5.59e-06	2.36e-06	8.04e-06	1.57e-06	2.21e-06	4.35e-07	1.61e-06	3.25108e-06
Lipid_Metabolism	ko00062: Fatty acid elongation in mitochondria	0	2.67e-06	6.76e-06	0	0	0	3.77e-06	7.98e-06	1.94e-06	7.96e-06	0	0	5.43e-06	2.80846e-06
Signal_Transduction	ko04310: Wnt signaling pathway	0	8.73e-07	5.52e-07	0	2.79e-07	0	9.24e-07	3.26e-07	1.42e-06	2.17e-07	1.52e-07	0	4.43e-07	3.98923e-07
Metabolism_of_Terpenoids_and_Polyketides	ko00909: Sesquiterpenoid biosynthesis	0	0	6.76e-07	0	0	0	7.55e-07	0	7.76e-07	0	0	0	0	1.69769e-07
Glycan_Biosynthesis_and_Metabolism	ko00563: Glycosylphosphatidylinositol(GPI)-anchor biosynthesis	0	0	0	0	0	0	5.81e-07	0	0	0	0	0	5.57e-07	8.75385e-08
Transcription	ko03040: Spliceosome	0	0	0	0	0	0	0	0	0	0	0	0	0	0
Signaling_Molecules_and_Interaction	ko04060: Cytokine-cytokine receptor interaction	0	0	0	0	0	0	0	0	0	0	0	0	0	0
Signal_Transduction	ko04075: Plant hormone signal transduction	0	0	0	0	0	0	0	0	0	0	0	0	0	0
Signal_Transduction	ko04340: Hedgehog signaling pathway	0	0	0	0	0	0	0	0	0	0	0	0	0	0
Metabolism_of_Terpenoids_and_Polyketides	ko00905: Brassinosteroid biosynthesis	0	0	0	0	0	0	0	0	0	0	0	0	0	0
Glycan_Biosynthesis_and_Metabolism	ko00532: Glycosaminoglycan biosynthesis - chondroitin sulfate	0	0	0	0	0	0	0	0	0	0	0	0	0	0
Glycan_Biosynthesis_and_Metabolism	ko00514: Other types of O-glycan biosynthesis	0	0	0	0	0	0	0	0	0	0	0	0	0	0

## Sheet: CAPs_Outdoor_Air_Toronto_Chambe
Metabolism	NAME	PM_01	PM_02	PM_03	PM_04	PM_05	PM_06	PM_07	PM_08	PM_09	Mean_abundance
Amino_Acid_Metabolism	ko00290: Valine, leucine and isoleucine biosynthesis	0.00989906	0.00896176	0.0090453	0.00938235	0.00933901	0.00934758	0.0089862	0.00894872	0.0089128	0.00920253
Carbohydrate_Metabolism	ko00660: C5-Branched dibasic acid metabolism	0.00368493	0.00326681	0.00366592	0.00399862	0.00392551	0.00407167	0.00386921	0.00449976	0.00436011	0.00392695
Lipid_Metabolism	ko00061: Fatty acid biosynthesis	0.00738336	0.00611109	0.00808184	0.00625697	0.00816419	0.00862424	0.00722843	0.0074803	0.00689826	0.00735874
Metabolism_of_Other_Amino_Acids	ko00471: D-Glutamine and D-glutamate metabolism	0.00926402	0.0082791	0.00954636	0.00813184	0.00908413	0.00954543	0.00858703	0.00800072	0.0080663	0.00872277
Metabolism_of_Cofactors_and_Vitamins	ko00770: Pantothenate and CoA biosynthesis	0.00371713	0.00470828	0.00413653	0.00417017	0.00369756	0.00420438	0.00361843	0.00348452	0.00369584	0.00393698
Metabolism_of_Cofactors_and_Vitamins	ko00670: One carbon pool by folate	0.00586179	0.00583988	0.00606511	0.00578611	0.00605119	0.00615813	0.00632716	0.00591546	0.00591432	0.00599102
Biosynthesis_of_Other_Secondary_Metabolites	ko00521: Streptomycin biosynthesis	0.00182111	0.00269208	0.00237288	0.00238881	0.00220537	0.00252312	0.00254213	0.00231051	0.00250467	0.00237341
Metabolism_of_Cofactors_and_Vitamins	ko00730: Thiamine metabolism	0.00498788	0.00530202	0.0054249	0.00503451	0.00556219	0.00560016	0.00524283	0.00489628	0.00473589	0.00519852
Metabolism_of_Terpenoids_and_Polyketides	ko00281: Geraniol degradation	0.00753436	0.00681964	0.00908902	0.00623872	0.00872542	0.00927921	0.00801674	0.0077786	0.00729603	0.00786419
Glycan_Biosynthesis_and_Metabolism	ko00550: Peptidoglycan biosynthesis	0.00828911	0.00604401	0.00741375	0.0068275	0.00769867	0.00822576	0.00751173	0.0080171	0.0078479	0.00754173
Translation	ko00970: Aminoacyl-tRNA biosynthesis	0.00300396	0.0033959	0.00378244	0.00336429	0.00373526	0.00377652	0.00361289	0.0028442	0.0029866	0.00338912
Amino_Acid_Metabolism	ko00250: Alanine, aspartate and glutamate metabolism	0.00368308	0.00245575	0.0024858	0.00241579	0.00269541	0.00305416	0.00236366	0.0024425	0.00239069	0.0026652
Carbohydrate_Metabolism	ko00030: Pentose phosphate pathway	0.000100852	0.000200212	0.000118525	0.000158119	0.000199065	0.000154582	0.000211844	0.000299192	0.000235146	0.000186393
Metabolism_of_Other_Amino_Acids	ko00473: D-Alanine metabolism	0.00508104	0.00332432	0.00470282	0.00389649	0.005207	0.00540369	0.00469646	0.00551012	0.00486022	0.00474246
Amino_Acid_Metabolism	ko00300: Lysine biosynthesis	0.00553728	0.00420445	0.00521709	0.00468194	0.00525919	0.00536743	0.00477104	0.00500773	0.00489039	0.00499295
Metabolism_of_Other_Amino_Acids	ko00450: Selenocompound metabolism	0.00844803	0.00850504	0.00759208	0.00729603	0.00790403	0.00780873	0.00802987	0.00973327	0.00895274	0.0082522
Metabolism_of_Cofactors_and_Vitamins	ko00785: Lipoic acid metabolism	0.00419052	0.00298778	0.0030952	0.00426053	0.00315308	0.0030671	0.00344464	0.00319388	0.00350884	0.00343351
Carbohydrate_Metabolism	ko00010: Glycolysis / Gluconeogenesis	0.0188862	0.0190062	0.0228906	0.0147096	0.0218466	0.0234768	0.019576	0.0185809	0.0170538	0.0195585
Carbohydrate_Metabolism	ko00620: Pyruvate metabolism	0.00329397	0.0031899	0.00364143	0.00306952	0.00348514	0.00363685	0.00352758	0.00329945	0.00333429	0.00338646
Replication_and_Repair	ko03430: Mismatch repair	0.000284116	0.000364899	0.000322389	0.00024579	0.000320472	0.000274812	0.000299183	0.000394036	0.000351216	0.000317435
Metabolism_of_Terpenoids_and_Polyketides	ko00903: Limonene and pinene degradation	0.000364117	0.000590058	0.000392031	0.000406171	0.000322625	0.000316841	0.000351612	0.000235954	0.000303684	0.000364788
Metabolism_of_Terpenoids_and_Polyketides	ko00900: Terpenoid backbone biosynthesis	0.00918158	0.00926137	0.00844114	0.0102407	0.0081967	0.00789382	0.00925111	0.00870338	0.00939695	0.00895186
Amino_Acid_Metabolism	ko00340: Histidine metabolism	0	0	8.78e-07	7.21e-07	4.97e-06	2.23e-06	4.04e-06	2.22e-06	5.03e-06	2.23211e-06
Lipid_Metabolism	ko00072: Synthesis and degradation of ketone bodies	0.000440659	0.000492579	0.000452998	0.000443327	0.000440136	0.000434212	0.000466559	0.000463018	0.000482472	0.000457329
Metabolism_of_Cofactors_and_Vitamins	ko00790: Folate biosynthesis	0.0114143	0.011029	0.0106313	0.0126596	0.0104503	0.0101434	0.0114288	0.010974	0.0116137	0.0111494
Energy_Metabolism	ko00710: Carbon fixation in photosynthetic organisms	0	0	0	0	0	0	0	0	0	0
Translation	ko03010: Ribosome	4.43e-06	8.69e-06	1.82e-05	4.49e-06	8.26e-06	1.06e-05	1.55e-05	4.6e-06	7.46e-06	9.13667e-06
Xenobiotics_Biodegradation_and_Metabolism	ko00930: Caprolactam degradation	0.00650258	0.00608747	0.00676503	0.00741262	0.00688064	0.00689178	0.00680922	0.00666825	0.00691604	0.0067704
Lipid_Metabolism	ko00071: Fatty acid metabolism	0	0	0	0	0	6.36e-07	0	6.93e-08	0	7.83667e-08
Carbohydrate_Metabolism	ko00650: Butanoate metabolism	0	0	0	0	0	0	0	0	0	0
Amino_Acid_Metabolism	ko00260: Glycine, serine and threonine metabolism	0.00477291	0.00586313	0.00525913	0.00470408	0.00499156	0.00497623	0.00470349	0.00437773	0.0044537	0.00490022
Replication_and_Repair	ko03440: Homologous recombination	0	0	0	0	0	0	0	0	0	0
Metabolism_of_Other_Amino_Acids	ko00410: beta-Alanine metabolism	5.88e-07	4.19e-07	0	0	1.83e-07	3.51e-07	0	1.53e-07	0	1.88222e-07
Carbohydrate_Metabolism	ko00020: Citrate cycle (TCA cycle)	0.0026481	0.00166022	0.00295602	0.00271284	0.00321367	0.00331664	0.00276782	0.00347512	0.00311556	0.002874
Amino_Acid_Metabolism	ko00280: Valine, leucine and isoleucine degradation	0.00853884	0.00963208	0.00781002	0.00937589	0.00767481	0.00735581	0.00860577	0.0082046	0.00879333	0.00844346
Membrane_Transport	ko02010: ABC transporters	0.00833851	0.00841624	0.0082629	0.00862855	0.00852453	0.00841531	0.00898036	0.00970202	0.00960439	0.00876365
Amino_Acid_Metabolism	ko00270: Cysteine and methionine metabolism	0.00731236	0.00821146	0.00691549	0.00779368	0.0067159	0.00651259	0.00748118	0.00730921	0.00760299	0.00731721
Metabolism_of_Cofactors_and_Vitamins	ko00780: Biotin metabolism	0.0101642	0.0119426	0.00936298	0.0112919	0.0092093	0.00894857	0.010271	0.00984765	0.0104223	0.0101623
Carbohydrate_Metabolism	ko00640: Propanoate metabolism	0.00514228	0.00467546	0.00487485	0.00548065	0.00496656	0.00491477	0.00535763	0.00558399	0.00566007	0.00518403
Energy_Metabolism	ko00720: Carbon fixation pathways in prokaryotes	0.00661462	0.00689573	0.00602766	0.00675077	0.00594657	0.00578592	0.0062979	0.00632094	0.0065101	0.00635002
Replication_and_Repair	ko03410: Base excision repair	0.00700204	0.0072936	0.00641364	0.00725032	0.00626892	0.00608148	0.00679893	0.00680971	0.00706181	0.00677561
Cell_Motility	ko02030: Bacterial chemotaxis	0	0	1.58e-05	1.95e-05	4.47e-06	7.16e-06	2.38e-05	1.25e-06	4.2e-05	1.26644e-05
Metabolism_of_Cofactors_and_Vitamins	ko00750: Vitamin B6 metabolism	0	0	0	0	0	0	0	0	0	0
Amino_Acid_Metabolism	ko00400: Phenylalanine, tyrosine and tryptophan biosynthesis	0.00118502	0.000999135	0.0010934	0.00114697	0.00120501	0.00123558	0.00132088	0.00153102	0.00148906	0.00124512
Xenobiotics_Biodegradation_and_Metabolism	ko00983: Drug metabolism - other enzymes	0	0	4.74e-05	2.92e-05	2.68e-05	8.87e-05	4.47e-05	1.25e-05	0.000103432	3.91924e-05
Metabolism_of_Cofactors_and_Vitamins	ko00760: Nicotinate and nicotinamide metabolism	0.023441	0.0222261	0.0282979	0.0183005	0.0267709	0.028953	0.0241502	0.0226498	0.0213316	0.0240134
Carbohydrate_Metabolism	ko00051: Fructose and mannose metabolism	0.00359647	0.00362178	0.00347427	0.00408069	0.00359044	0.00333264	0.00381896	0.00356506	0.00374173	0.00364689
Metabolism_of_Cofactors_and_Vitamins	ko00740: Riboflavin metabolism	0.00570857	0.00621171	0.0055641	0.00618854	0.00504993	0.00473669	0.00506282	0.00410392	0.00471585	0.00526024
Carbohydrate_Metabolism	ko00520: Amino sugar and nucleotide sugar metabolism	0.0028887	0.0027157	0.00238532	0.00326455	0.0024268	0.00226076	0.00277705	0.0027881	0.00295993	0.00271855
Replication_and_Repair	ko03030: DNA replication	0	0	0	0	0	8.59e-07	0	0	0	9.54444e-08
Metabolism_of_Other_Amino_Acids	ko00480: Glutathione metabolism	0.00133905	0.00177805	0.000697905	0.0019249	0.0008231	0.000709763	0.00121505	0.000914736	0.00130279	0.00118948
Xenobiotics_Biodegradation_and_Metabolism	ko00625: Chloroalkane and chloroalkene degradation	0.0112042	0.0108057	0.0108339	0.0113094	0.0108504	0.0107826	0.0113184	0.0114416	0.0115758	0.0111247
Amino_Acid_Metabolism	ko00330: Arginine and proline metabolism	0.0191672	0.0156109	0.0194845	0.0146328	0.0193957	0.0205438	0.0172557	0.0167541	0.0157105	0.0176172
Nucleotide_Metabolism	ko00240: Pyrimidine metabolism	0.00204175	0.00154523	0.00181598	0.00157841	0.00184239	0.00179425	0.00139212	0.00167494	0.00146698	0.00168356
Metabolism_of_Cofactors_and_Vitamins	ko00860: Porphyrin and chlorophyll metabolism	0.0113243	0.0110093	0.0110276	0.0117822	0.0109395	0.0107326	0.0110707	0.0112805	0.0113943	0.0111734
Carbohydrate_Metabolism	ko00630: Glyoxylate and dicarboxylate metabolism	0.00617361	0.00685084	0.00712189	0.00629922	0.00717528	0.00698624	0.0067119	0.00690012	0.00672954	0.00677207
Transcription	ko03020: RNA polymerase	0.0114638	0.0115604	0.01187	0.0113866	0.011424	0.0113288	0.0109563	0.0107623	0.0105572	0.0112566
Carbohydrate_Metabolism	ko00500: Starch and sucrose metabolism	0.0150234	0.0144339	0.016838	0.0126471	0.0165336	0.0175858	0.0150813	0.0146548	0.0138003	0.0151776
Metabolism_of_Cofactors_and_Vitamins	ko00130: Ubiquinone and other terpenoid-quinone biosynthesis	0.00608408	0.00643025	0.00621072	0.0066834	0.006526	0.0064771	0.00663279	0.00722175	0.00710148	0.0065964
Carbohydrate_Metabolism	ko00052: Galactose metabolism	0.0116124	0.0116431	0.0104263	0.013149	0.010238	0.00994191	0.0115529	0.0115289	0.0122082	0.0113667
Xenobiotics_Biodegradation_and_Metabolism	ko00626: Naphthalene degradation	0.0120447	0.0120777	0.0103038	0.0111835	0.010587	0.0105058	0.0106859	0.011838	0.0115747	0.0112001
Energy_Metabolism	ko00920: Sulfur metabolism	0.00905431	0.00936718	0.00871556	0.00915523	0.00883689	0.00868092	0.00888208	0.00925169	0.00919467	0.00901539
Energy_Metabolism	ko00195: Photosynthesis	0.00792412	0.00891328	0.00757673	0.00874398	0.00783398	0.00756593	0.00812664	0.00891686	0.00894403	0.00828284
Nucleotide_Metabolism	ko00230: Purine metabolism	0.00838276	0.00880847	0.00782168	0.00931037	0.00792308	0.00767614	0.00835701	0.00800277	0.00851293	0.00831058
Metabolism_of_Other_Amino_Acids	ko00460: Cyanoamino acid metabolism	0.00654965	0.00675741	0.00623976	0.00852626	0.00643628	0.00619186	0.00761297	0.00667386	0.00756346	0.00695017
Xenobiotics_Biodegradation_and_Metabolism	ko00363: Bisphenol degradation	0.0111016	0.0126857	0.0112631	0.0132121	0.0108695	0.0106419	0.0116818	0.0114074	0.0121562	0.0116688
Amino_Acid_Metabolism	ko00380: Tryptophan metabolism	0.0104911	0.0104179	0.0100509	0.0102015	0.00998754	0.00972435	0.0100944	0.0101838	0.0102034	0.0101505
Carbohydrate_Metabolism	ko00040: Pentose and glucuronate interconversions	0.00201225	0.00218123	0.00219338	0.00249098	0.0021661	0.00217894	0.00226573	0.00196511	0.00220816	0.00218465
Membrane_Transport	ko03070: Bacterial secretion system	0.0108748	0.0108299	0.00998694	0.0111141	0.0100418	0.00990183	0.00964164	0.00889648	0.00891906	0.0100229
Metabolism_of_Other_Amino_Acids	ko00430: Taurine and hypotaurine metabolism	0.0106039	0.0112786	0.0101754	0.014401	0.0105035	0.0101122	0.0125387	0.0109467	0.0125136	0.0114526
Amino_Acid_Metabolism	ko00350: Tyrosine metabolism	0.00717385	0.00599648	0.00581556	0.00882749	0.00600495	0.00586763	0.00688729	0.005971	0.00697269	0.00661299
Metabolism_of_Terpenoids_and_Polyketides	ko00253: Tetracycline biosynthesis	0.013885	0.013277	0.0129659	0.0143854	0.0132931	0.0130542	0.0133281	0.0135235	0.0136123	0.0134805
Amino_Acid_Metabolism	ko00310: Lysine degradation	0.0132919	0.0120091	0.0119837	0.0134669	0.0118519	0.0113501	0.0124236	0.0121408	0.0125981	0.0123462
Lipid_Metabolism	ko01040: Biosynthesis of unsaturated fatty acids	0.00209895	0.00426524	0.00175449	0.00157658	0.00138015	0.00133609	0.00131169	0.00177704	0.00159052	0.00189897
Replication_and_Repair	ko03420: Nucleotide excision repair	0.00871303	0.0106616	0.0091588	0.0085262	0.00860241	0.00857744	0.00833273	0.00776525	0.00772909	0.00867406
Glycan_Biosynthesis_and_Metabolism	ko00511: Other glycan degradation	0.00946741	0.0096195	0.00901766	0.0104924	0.00931646	0.00943608	0.00906945	0.0107853	0.0103896	0.00973265
Energy_Metabolism	ko00910: Nitrogen metabolism	0.00482435	0.00510746	0.00443018	0.00466573	0.00434319	0.00428986	0.00442587	0.00430107	0.00438729	0.00453056
Xenobiotics_Biodegradation_and_Metabolism	ko00627: Aminobenzoate degradation	0.00468694	0.00443354	0.00378836	0.00449362	0.00407104	0.00400839	0.00415246	0.0044603	0.00448171	0.00428626
Xenobiotics_Biodegradation_and_Metabolism	ko00362: Benzoate degradation	0.00069156	0.000453044	0.000659297	0.00046341	0.000659822	0.000706353	0.00059673	0.000484317	0.000505443	0.000579997
Energy_Metabolism	ko00190: Oxidative phosphorylation	0.020401	0.0174672	0.0262237	0.0147391	0.0242032	0.025257	0.021994	0.0204255	0.0182638	0.0209972
Amino_Acid_Metabolism	ko00360: Phenylalanine metabolism	0.00185651	0.00288364	0.00265666	0.00235615	0.00272236	0.00284136	0.00285495	0.00300581	0.00302954	0.00268966
Lipid_Metabolism	ko00561: Glycerolipid metabolism	0.00381799	0.00283719	0.00369404	0.0031267	0.00355484	0.00373859	0.00352794	0.00406278	0.00387223	0.00358137
Cell_Motility	ko02040: Flagellar assembly	0.00222905	0.0021598	0.00239167	0.00207397	0.00234852	0.00232609	0.00224069	0.00224341	0.00218869	0.00224465
Lipid_Metabolism	ko00564: Glycerophospholipid metabolism	0	0	0	0	1.12e-05	0	0	0	0	1.24444e-06
Xenobiotics_Biodegradation_and_Metabolism	ko00623: Toluene degradation	0.0155446	0.0152722	0.0156271	0.0161921	0.0154655	0.0151048	0.0149269	0.0145551	0.014786	0.0152749
Glycan_Biosynthesis_and_Metabolism	ko00540: Lipopolysaccharide biosynthesis	8.64e-05	0.000193153	8.89e-05	0.000564363	0.000142589	0.000154045	0.000308852	0.000128559	0.000338174	0.000222782
Xenobiotics_Biodegradation_and_Metabolism	ko00642: Ethylbenzene degradation	0.0155757	0.0145055	0.0176529	0.0133497	0.0170193	0.0181133	0.0159645	0.0148437	0.0144364	0.0157179
Energy_Metabolism	ko00680: Methane metabolism	0.00700397	0.00838289	0.00729325	0.00686447	0.0074079	0.00749379	0.00698541	0.00695622	0.0068013	0.00724324
Biosynthesis_of_Other_Secondary_Metabolites	ko00960: Tropane, piperidine and pyridine alkaloid biosynthesis	0.00102437	0.00102262	0.000802416	0.00109029	0.000912567	0.000804255	0.000833114	0.00114591	0.00113937	0.00097499
Membrane_Transport	ko02060: Phosphotransferase system (PTS)	0.000566695	0.000426663	0.000594602	0.000667614	0.000622792	0.000688939	0.000589621	0.00063329	0.000671769	0.000606887
Xenobiotics_Biodegradation_and_Metabolism	ko00621: Dioxin degradation	0	0	0	0	0	0	0	0	0	0
Xenobiotics_Biodegradation_and_Metabolism	ko00624: Polycyclic aromatic hydrocarbon degradation	2.31e-06	4.52e-06	9.48e-06	2.34e-06	4.29e-06	5.5e-06	8.39e-06	2.39e-06	3.88e-06	4.78889e-06
Metabolism_of_Terpenoids_and_Polyketides	ko00523: Polyketide sugar unit biosynthesis	0.00278065	0.00373601	0.00291276	0.00306264	0.00296249	0.00242178	0.00316193	0.00416158	0.00408475	0.00325384
Signal_Transduction	ko02020: Two-component system	0.000331372	0.000305218	0.000320557	0.000838141	0.000414803	0.000398946	0.000661656	0.000636463	0.000775299	0.000520273
Carbohydrate_Metabolism	ko00053: Ascorbate and aldarate metabolism	0.00104146	0.00131715	0.00113276	0.000767312	0.00107105	0.000891913	0.000930077	0.000988403	0.000917035	0.00100635
Biosynthesis_of_Other_Secondary_Metabolites	ko00940: Phenylpropanoid biosynthesis	0	0	0	0	0	0	0	0	0	0
Metabolism_of_Terpenoids_and_Polyketides	ko00908: Zeatin biosynthesis	8.87e-06	1.58e-06	1.19e-05	5.99e-06	2.75e-06	1.32e-06	3.87e-06	4.03e-06	1.12e-05	5.72333e-06
Lipid_Metabolism	ko00591: Linoleic acid metabolism	0.0117414	0.0129676	0.0114134	0.013262	0.01102	0.0107493	0.0119392	0.011211	0.0121148	0.0118243
Xenobiotics_Biodegradation_and_Metabolism	ko00791: Atrazine degradation	0	0	0	0	0	0	0	0	0	0
Xenobiotics_Biodegradation_and_Metabolism	ko00643: Styrene degradation	0.00708465	0.00885793	0.00742521	0.00695205	0.00714665	0.00698538	0.00651893	0.00609754	0.00607533	0.00701596
Xenobiotics_Biodegradation_and_Metabolism	ko00361: Chlorocyclohexane and chlorobenzene degradation	0.0041884	0.00399452	0.0037064	0.00406783	0.0038722	0.00380748	0.00391599	0.00405606	0.004062	0.00396343
Carbohydrate_Metabolism	ko00562: Inositol phosphate metabolism	0.00774943	0.00899478	0.00784341	0.00737017	0.00761591	0.00755251	0.00745597	0.00689404	0.0070059	0.00760912
Biosynthesis_of_Other_Secondary_Metabolites	ko00311: Penicillin and cephalosporin biosynthesis	0.000209938	0.000581813	4.06e-05	0.00314616	0.000115029	4.01e-05	0.00132041	0.000180228	0.00136678	0.000777895
Biosynthesis_of_Other_Secondary_Metabolites	ko00312: beta-Lactam resistance	0.003456	0.00402253	0.00291128	0.00826324	0.00304077	0.00280529	0.00516921	0.00329649	0.00527291	0.00424864
Transport_and_Catabolism	ko04146: Peroxisome	0.00507536	0.004926	0.0049608	0.0057262	0.00497108	0.00482289	0.0052725	0.00477872	0.00507516	0.00506763
Xenobiotics_Biodegradation_and_Metabolism	ko00622: Xylene degradation	0.011437	0.0113931	0.0115879	0.0103972	0.0112166	0.0111324	0.0112032	0.0103463	0.0103938	0.0110119
Xenobiotics_Biodegradation_and_Metabolism	ko00364: Fluorobenzoate degradation	0.0101829	0.0105861	0.00888215	0.0113435	0.0091033	0.00863512	0.00957564	0.00955005	0.0100528	0.00976795
Xenobiotics_Biodegradation_and_Metabolism	ko00633: Nitrotoluene degradation	0.00647012	0.00526157	0.00579304	0.00569209	0.00591719	0.00583478	0.00563061	0.00573821	0.00567007	0.00577863
Energy_Metabolism	ko00196: Photosynthesis - antenna proteins	0.00869115	0.00983361	0.00968182	0.00679831	0.00893907	0.00885574	0.00742184	0.00702995	0.00662149	0.00820811
Metabolism_of_Cofactors_and_Vitamins	ko00830: Retinol metabolism	0.0156	0.0207123	0.0169373	0.012023	0.0161007	0.0156676	0.0132011	0.0134107	0.0121008	0.0150837
Replication_and_Repair	ko03450: Non-homologous end-joining	0.00378479	0.00433235	0.00385774	0.00356937	0.00408516	0.00391309	0.0037966	0.00402218	0.00383148	0.00391031
Lipid_Metabolism	ko00592: alpha-Linolenic acid metabolism	0.0101141	0.0105753	0.00919608	0.0108647	0.00972443	0.00954887	0.0104466	0.0110632	0.0112283	0.0103068
Lipid_Metabolism	ko00590: Arachidonic acid metabolism	0.00505055	0.00632003	0.00452115	0.00639555	0.00484801	0.00456532	0.00557318	0.00601021	0.00622361	0.00550085
Lipid_Metabolism	ko00600: Sphingolipid metabolism	0.0119395	0.012109	0.0122132	0.0120197	0.0120689	0.0120822	0.0122857	0.0119634	0.0120607	0.0120825
Metabolism_of_Terpenoids_and_Polyketides	ko00906: Carotenoid biosynthesis	0.00574859	0.00711641	0.00573343	0.00612192	0.00641859	0.00618493	0.00633403	0.00806467	0.00736579	0.00656537
Metabolism_of_Terpenoids_and_Polyketides	ko01053: Biosynthesis of siderophore group nonribosomal peptides	0.0102459	0.0100044	0.0110904	0.00918285	0.0110183	0.0110911	0.0103338	0.0106612	0.0100035	0.0104035
Metabolism_of_Other_Amino_Acids	ko00440: Phosphonate and phosphinate metabolism	0.0067902	0.00724908	0.00605093	0.00738664	0.00614657	0.00591387	0.00672712	0.0070921	0.00732014	0.00674185
Biosynthesis_of_Other_Secondary_Metabolites	ko00941: Flavonoid biosynthesis	0.00491842	0.0045739	0.00421092	0.00515778	0.00449157	0.00421635	0.00465204	0.00583734	0.00561241	0.0048523
Glycan_Biosynthesis_and_Metabolism	ko00531: Glycosaminoglycan degradation	0.00469845	0.00563731	0.00485756	0.00419326	0.00484118	0.00482591	0.0044965	0.00465202	0.00446589	0.0047409
Glycan_Biosynthesis_and_Metabolism	ko00510: N-Glycan biosynthesis	0.00616816	0.00658693	0.00533938	0.00708609	0.00554833	0.00534427	0.00608647	0.00680979	0.00692112	0.00621006
Lipid_Metabolism	ko00140: Steroid hormone biosynthesis	0.0137491	0.012929	0.0149159	0.01109	0.0144812	0.0150215	0.0134416	0.0129849	0.0122323	0.0134273
Translation	ko03013: RNA transport	0.0107299	0.00998208	0.0108249	0.0103867	0.0113408	0.0113363	0.011569	0.0122771	0.0118052	0.0111391
Lipid_Metabolism	ko00100: Steroid biosynthesis	0.013096	0.0126261	0.0143256	0.0111499	0.0140837	0.0146649	0.0134017	0.0133532	0.0126908	0.0132658
Translation	ko03008: Ribosome biogenesis in eukaryotes	0.0109143	0.012527	0.00992649	0.0118919	0.0106076	0.0101353	0.0110487	0.0125532	0.0124114	0.0113351
Lipid_Metabolism	ko00565: Ether lipid metabolism	0.0178029	0.0175742	0.0168819	0.0180467	0.0177995	0.0174892	0.0183277	0.0186683	0.0186678	0.0179176
Transport_and_Catabolism	ko04142: Lysosome	0.00304616	0.00313152	0.00396552	0.00319852	0.00398385	0.00396024	0.0036436	0.00388095	0.00387454	0.00363166
Xenobiotics_Biodegradation_and_Metabolism	ko00351: DDT degradation	0.000371713	0.000434306	0.000321203	0.00152281	0.000535909	0.000478345	0.000967352	0.000795851	0.00112385	0.000727927
Metabolism_of_Terpenoids_and_Polyketides	ko01056: Biosynthesis of type II polyketide backbone	5.35e-05	2.05e-05	9.14e-05	3.48e-05	8.56e-05	5.77e-05	4.67e-05	3.42e-05	4.71e-05	5.23889e-05
Biosynthesis_of_Other_Secondary_Metabolites	ko00901: Indole alkaloid biosynthesis	0.0032633	0.00376039	0.00421654	0.00359782	0.00391867	0.00382805	0.00352375	0.0033416	0.0036581	0.00367869
Biosynthesis_of_Other_Secondary_Metabolites	ko00331: Clavulanic acid biosynthesis	0.0118846	0.0121485	0.0113034	0.0143069	0.0121437	0.0113465	0.0129213	0.0130223	0.013542	0.0125132
Metabolism_of_Terpenoids_and_Polyketides	ko00522: Biosynthesis of 12-, 14- and 16-membered macrolides	0.004231	0.00406841	0.00430444	0.00466248	0.00472835	0.00455945	0.00450186	0.00515421	0.00485645	0.00456296
Biosynthesis_of_Other_Secondary_Metabolites	ko00943: Isoflavonoid biosynthesis	0.00224314	0.00315206	0.00271605	0.00337495	0.00314237	0.00300246	0.00343791	0.00391309	0.00387497	0.00320633
Transcription	ko03022: Basal transcription factors	7.68e-05	6.84e-05	7.11e-05	6.49e-05	3.58e-05	0.000114505	0.000100678	8.73e-05	0.0001002	7.99648e-05
Glycan_Biosynthesis_and_Metabolism	ko00513: Various types of N-glycan biosynthesis	0.000524433	6.98e-05	0.000177788	0.000186824	0.000241562	0.000180346	0.000134238	0.000160068	0.0001183	0.000199262
Glycan_Biosynthesis_and_Metabolism	ko00601: Glycosphingolipid biosynthesis - lacto and neolacto series	0.0123627	0.0118081	0.0117265	0.0131537	0.0120751	0.0118818	0.012421	0.0132947	0.0132479	0.0124413
Translation	ko03015: mRNA surveillance pathway	0.00952389	0.00893444	0.010443	0.00741348	0.0101489	0.0106674	0.00934973	0.0089705	0.00837152	0.00931365
Lipid_Metabolism	ko00062: Fatty acid elongation in mitochondria	0.0106788	0.0112581	0.0100723	0.011674	0.0101411	0.00984901	0.0106165	0.0106909	0.011	0.0106645
Signal_Transduction	ko04310: Wnt signaling pathway	0.0110887	0.010004	0.0101004	0.0104476	0.0104111	0.0102643	0.0101014	0.0110065	0.0105843	0.0104454
Metabolism_of_Terpenoids_and_Polyketides	ko00909: Sesquiterpenoid biosynthesis	0.00998951	0.00886066	0.0107594	0.00805709	0.0107932	0.0112878	0.0100278	0.0102879	0.00951626	0.00995329
Glycan_Biosynthesis_and_Metabolism	ko00563: Glycosylphosphatidylinositol(GPI)-anchor biosynthesis	0.00891344	0.0094347	0.00876512	0.00914333	0.00874367	0.00867871	0.00902496	0.00952383	0.00943963	0.00907415
Transcription	ko03040: Spliceosome	0.00617749	0.0050673	0.00624263	0.00592993	0.0067627	0.00687989	0.00618947	0.00720133	0.00659155	0.00633803
Signaling_Molecules_and_Interaction	ko04060: Cytokine-cytokine receptor interaction	0.0157101	0.0139543	0.0179177	0.0123771	0.017352	0.0181965	0.0160218	0.0152859	0.0142268	0.0156714
Signal_Transduction	ko04075: Plant hormone signal transduction	0.00804124	0.00828702	0.00795496	0.00865974	0.00797558	0.00770361	0.00810083	0.00823792	0.00840489	0.00815175
Signal_Transduction	ko04340: Hedgehog signaling pathway	0.00619801	0.00533601	0.00615605	0.00651341	0.00644886	0.00638107	0.00630756	0.00694946	0.00674299	0.00633705
Metabolism_of_Terpenoids_and_Polyketides	ko00905: Brassinosteroid biosynthesis	0.0188738	0.0178389	0.0179598	0.0203808	0.0188597	0.0184999	0.0194119	0.0202403	0.0203658	0.019159
Glycan_Biosynthesis_and_Metabolism	ko00532: Glycosaminoglycan biosynthesis - chondroitin sulfate	0.0118354	0.00962368	0.0110572	0.0114194	0.0116595	0.0116294	0.0115714	0.0122059	0.0118913	0.0114326
Glycan_Biosynthesis_and_Metabolism	ko00514: Other types of O-glycan biosynthesis	0.00767348	0.00720225	0.00722684	0.00849788	0.00770328	0.00758242	0.00784866	0.00840077	0.00839553	0.00783679
