# Supplementary material for: Characterization of the bacterial and fungal microbiome in indoor dust and outdoor air samples: a pilot study
Source: Royal Society of Chemistry journal article supplement (doi:10.1039/c5em00639b), 2016-01-01
Supplement: c5em00639b2.pdf [file c5em00639b2.pdf]

ESI replaced on 12<sup>th</sup> July 2016

ESI Fig. S1a–c should read Fig. 1. Please refer to Fig. 1 in the main article for comparison by sample type at the phylum level.

Supplemental Table 1. Fungal Genera detectable in House Dust by ITS sequencing, that were non-detectable by Culture

| Fungal Genera (ITS) | House Dust Samples (N, %) with detectable levels* |
|---------------------|---------------------------------------------------|
| Cryptococcus        | 10 (100%)                                         |
| Leptosphaerulina    | 10 (100%)                                         |
| Rhodotorula         | 9 (90%)                                           |
| Coniozyma           | 8 (80%)                                           |
| Malassezia**        | 8 (80%)                                           |
| Phoma               | 8 (80%)                                           |
| Peyronellaea        | 6 (60%)                                           |
| Ophiocordyceps      | 4 (40%)                                           |
| Coniosporium        | 3 (30%)                                           |
| Didymella           | 3 (30%)                                           |
| Phaeosphaeriopsis   | 3 (30%)                                           |
| Puccinia            | 3 (30%)                                           |
| Sclerotinia         | 3 (30%)                                           |
| Candida**           | 2 (20%)                                           |
| Cystofilobasidium   | 2 (20%)                                           |
| Debaryomyces        | 2 (20%)                                           |
| Exophiala           | 2 (20%)                                           |
| Filobasidium        | 2 (20%)                                           |
| Funneliformis       | 2 (20%)                                           |
| Ganoderma           | 2 (20%)                                           |
| Limonomyces         | 2 (20%)                                           |
| Pseudeurotium       | 2 (20%)                                           |
| Sporobolomyces      | 2 (20%)                                           |
| Tilia***            | 2 (20%)                                           |
| Trichosporon        | 2 (20%)                                           |
| Armillaria          | 1 (10%)                                           |
| Botrytis            | 1 (10%)                                           |
| Candelina           | 1 (10%)                                           |
| Coniothyrium        | 1 (10%)                                           |
| Cyberlindnera       | 1 (10%)                                           |
| Eupenicillium       | 1 (10%)                                           |
| Gyoerffyyella       | 1 (10%)                                           |
| Hannaella           | 1 (10%)                                           |
| Lophozonia          | 1 (10%)                                           |
| Melampsora          | 1 (10%)                                           |
| Meyerozyma          | 1 (10%)                                           |
| Phaeococcomyces     | 1 (10%)                                           |
| Placynthiella       | 1 (10%)                                           |
| Pseudorobillarda    | 1 (10%)                                           |
| Saccharomyces**     | 1 (10%)                                           |

|                  |         |
|------------------|---------|
| Stagonosporopsis | 1 (10%) |
| Sydowia          | 1 (10%) |
| Taphrina         | 1 (10%) |
| Ampelomyces      | 1 (10%) |
| Articulospora    | 1 (10%) |
| Arundinaria      | 2 (20%) |
| Blumeria         | 1 (10%) |
| Bullera          | 1 (10%) |
| Clavulina        | 1 (10%) |
| Coprinellus      | 1 (10%) |
| Curreya          | 2 (20%) |
| Cyphellophora    | 1 (10%) |
| Dactylella       | 1 (10%) |
| Dioszegia        | 1 (10%) |
| Erysiphe         | 2 (20%) |
| Fusarium         | 1 (10%) |
| Guehomyces       | 1 (10%) |
| Hormonema        | 8 (80%) |
| Hyphodontia      | 1 (10%) |
| Hyphopichia      | 1 (10%) |
| Impatiens***     | 1 (10%) |
| Kwoniella        | 1 (10%) |
| Laetisaria       | 1 (10%) |
| Leptosphaeria    | 1 (10%) |
| Leuconeurospora  | 2 (20%) |
| Leucosporidiella | 1 (10%) |
| Medicago***      | 1 (10%) |
| Nothofagus***    | 1 (10%) |
| Osmorhiza***     | 1 (10%) |
| Paraphoma        | 3 (30%) |
| Phaeosphaeria    | 1 (10%) |
| Phanerochaete    | 1 (10%) |
| Phyllosticta     | 1 (10%) |
| Podosphaera      | 1 (10%) |
| Rhodosporidium   | 2 (20%) |
| Trametes         | 1 (10%) |
| Trapeliopsis     | 1 (10%) |
| Trebouxia        | 1 (10%) |
| Tumularia        | 2 (20%) |
| Urochloa         | 1 (10%) |
| Uromyces         | 1 (10%) |

\*Level of detection was at or above 0.1% relative abundance (< 0.1% abundance considered non-detectable, as a way to mitigate spurious detection at very low read counts)

\*\*Yeasts were cultured from house dust, but were not identified taxonomically at the level of genera

\*\*\*Denotes plant taxonomic grouping
